# Supplementary material for: Predicting Transcriptional Activity of Multiple Site p53 Mutants Based on Hybrid Properties
Source: PLoS One. 2011 Aug 8;6(8):e22940. doi: 10.1371/journal.pone.0022940 (PMC3152557; doi:10.1371/journal.pone.0022940)
Supplement: Table S2 — The IFS results for two-site p53 mutants. (XLS) [file pone.0022940.s002.xls]

## Sheet: TableS2
Table S2 - The IFS results for two-site p53 mutants
Number of features	TP	FP	TN	FN	MCC
1	14	7636	8679	43	-0.0262584
2	12	656	15659	45	0.0507105
3	8	95	16220	49	0.100218
4	8	51	16264	49	0.134887
5	10	42	16273	47	0.180957
6	13	32	16283	44	0.254384
7	13	46	16269	44	0.221414
8	12	45	16270	45	0.207768
9	12	45	16270	45	0.207768
10	12	48	16267	45	0.202347
11	12	51	16264	45	0.197313
12	12	49	16266	45	0.200628
13	13	49	16266	44	0.215834
14	13	55	16260	44	0.205793
15	12	49	16266	45	0.200628
16	12	47	16268	45	0.204108
17	10	44	16271	47	0.177459
18	10	41	16274	47	0.182781
19	10	43	16272	47	0.179183
20	10	40	16275	47	0.18466
21	10	39	16276	47	0.186595
22	10	39	16276	47	0.186595
23	10	41	16274	47	0.182781
24	12	35	16280	45	0.229411
25	12	35	16280	45	0.229411
26	12	36	16279	45	0.226949
27	12	40	16275	45	0.217815
28	12	35	16280	45	0.229411
29	12	35	16280	45	0.229411
30	12	34	16281	45	0.231952
31	13	34	16281	44	0.248793
32	13	33	16282	44	0.251543
33	13	34	16281	44	0.248793
34	13	34	16281	44	0.248793
35	13	34	16281	44	0.248793
36	13	31	16284	44	0.25732
37	13	34	16281	44	0.248793
38	13	36	16279	44	0.243545
39	13	35	16280	44	0.246128
40	14	36	16279	43	0.259832
41	14	36	16279	43	0.259832
42	14	36	16279	43	0.259832
43	14	36	16279	43	0.259832
44	14	36	16279	43	0.259832
45	14	36	16279	43	0.259832
46	14	36	16279	43	0.259832
47	14	34	16281	43	0.265308
48	14	33	16282	43	0.268174
49	14	33	16282	43	0.268174
50	16	29	16286	41	0.313804
51	16	29	16286	41	0.313804
52	16	29	16286	41	0.313804
53	16	31	16284	41	0.306938
54	15	32	16283	42	0.287556
55	15	32	16283	42	0.287556
56	16	32	16283	41	0.303667
57	16	32	16283	41	0.303667
58	16	33	16282	41	0.300495
59	16	33	16282	41	0.300495
60	16	33	16282	41	0.300495
61	16	33	16282	41	0.300495
62	15	32	16283	42	0.287556
63	15	32	16283	42	0.287556
64	15	36	16279	42	0.275824
65	15	36	16279	42	0.275824
66	14	35	16280	43	0.262528
67	14	35	16280	43	0.262528
68	14	35	16280	43	0.262528
69	14	33	16282	43	0.268174
70	14	33	16282	43	0.268174
71	12	33	16282	45	0.234577
72	12	33	16282	45	0.234577
73	12	36	16279	45	0.226949
74	12	36	16279	45	0.226949
75	12	36	16279	45	0.226949
76	12	37	16278	45	0.224562
77	12	38	16277	45	0.222246
78	12	38	16277	45	0.222246
79	12	38	16277	45	0.222246
80	12	37	16278	45	0.224562
81	12	37	16278	45	0.224562
82	12	37	16278	45	0.224562
83	14	33	16282	43	0.268174
84	14	33	16282	43	0.268174
85	14	31	16284	43	0.27419
86	14	31	16284	43	0.27419
87	14	31	16284	43	0.27419
88	14	31	16284	43	0.27419
89	14	31	16284	43	0.27419
90	15	33	16282	42	0.284487
91	15	33	16282	42	0.284487
92	15	35	16280	42	0.278625
93	15	36	16279	42	0.275824
94	16	38	16277	41	0.285974
95	16	38	16277	41	0.285974
96	16	38	16277	41	0.285974
97	16	38	16277	41	0.285974
98	16	38	16277	41	0.285974
99	16	38	16277	41	0.285974
100	16	38	16277	41	0.285974
